# Supplementary material for: A new layered MWW zeolite synthesized with the bifunctional surfactant template and the updated classification of layered zeolite forms obtained by direct synthesis
Source: Royal Society of Chemistry journal article supplement (doi:10.1039/c8ta09826c), 2019-01-01
Supplement: c8ta09826c1.pdf [file c8ta09826c1.pdf]

## Electronic Supplementary Information

### **A new layered MWW zeolite synthesized with the bifunctional surfactant template and the updated classification of layered zeolite forms obtained by direct synthesis**

Justyna Grzybek,<sup>a</sup> Wieslaw J. Roth,<sup>\*a</sup> Barbara Gil,<sup>a</sup> Aleksandra Korzeniowska,<sup>a</sup> Michal Mazur,<sup>b,c</sup> Jiří Čejka<sup>b</sup> and Russell E. Morris<sup>b,c</sup>

<sup>a</sup> Faculty of Chemistry, Jagiellonian University in Kraków, Gronostajowa 2, 30-387 Kraków, Poland

<sup>b</sup> Department of Physical and Macromolecular Chemistry, Faculty of Sciences, Charles University, Hlavova 8, 128 43 Prague 2, Czech Republic

<sup>c</sup> EaStCHEM School of Chemistry, University of St Andrews, St Andrews KY16 9ST, UK

\*e-mail: wieslaw.roth@uj.edu.pl

#### Contents:

TEM imaging of layer disorder (Figure S1.)

Expanded Fig 3. with XRD patterns of various MWW layered forms before and after clacination; the latter represent finally used catalysts (Figure S2).

Low angle XRDs for swollen MIT-1 and UJM-1P (Figure S3.)

Catalytic reaction data for MWW zeolites (Table S1)

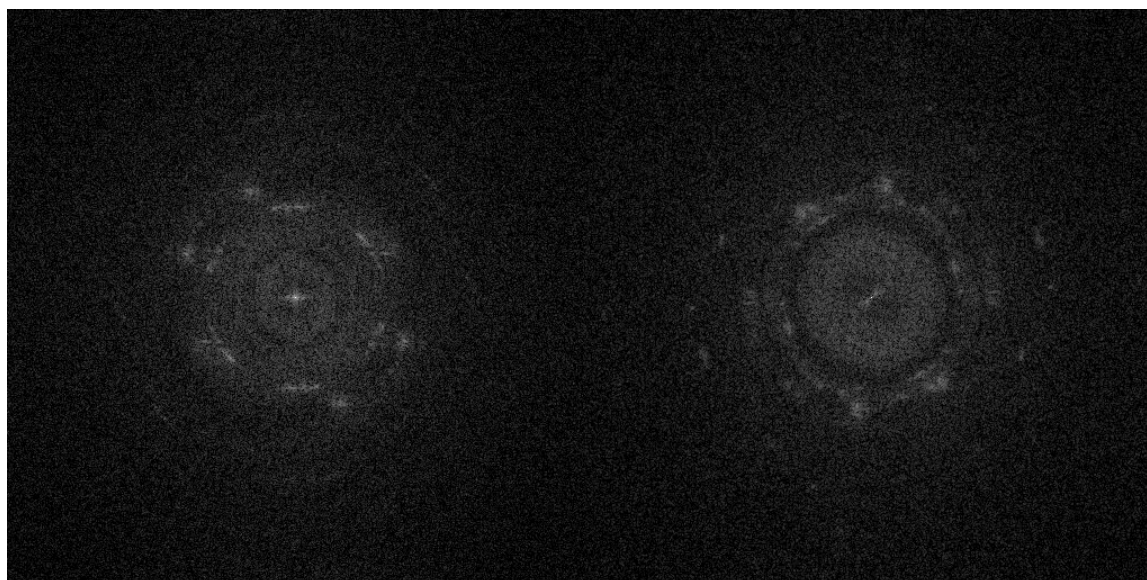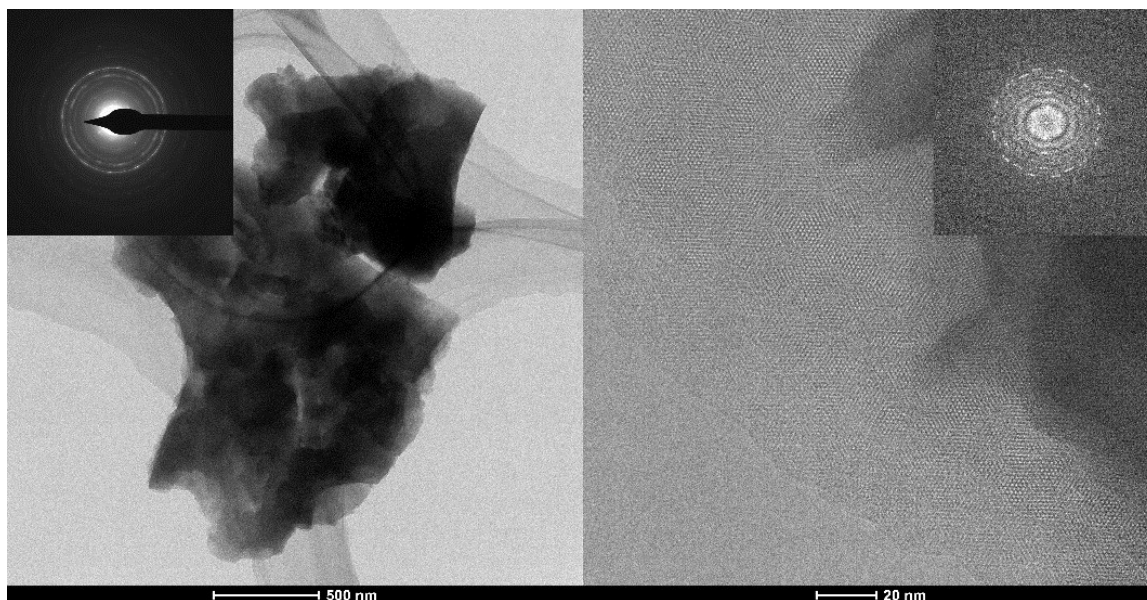

Figure S1. FFT patterns (upper images) and TEM images of UJM-1P with SAED (down right) and FFT (down left) patterns overlaid.

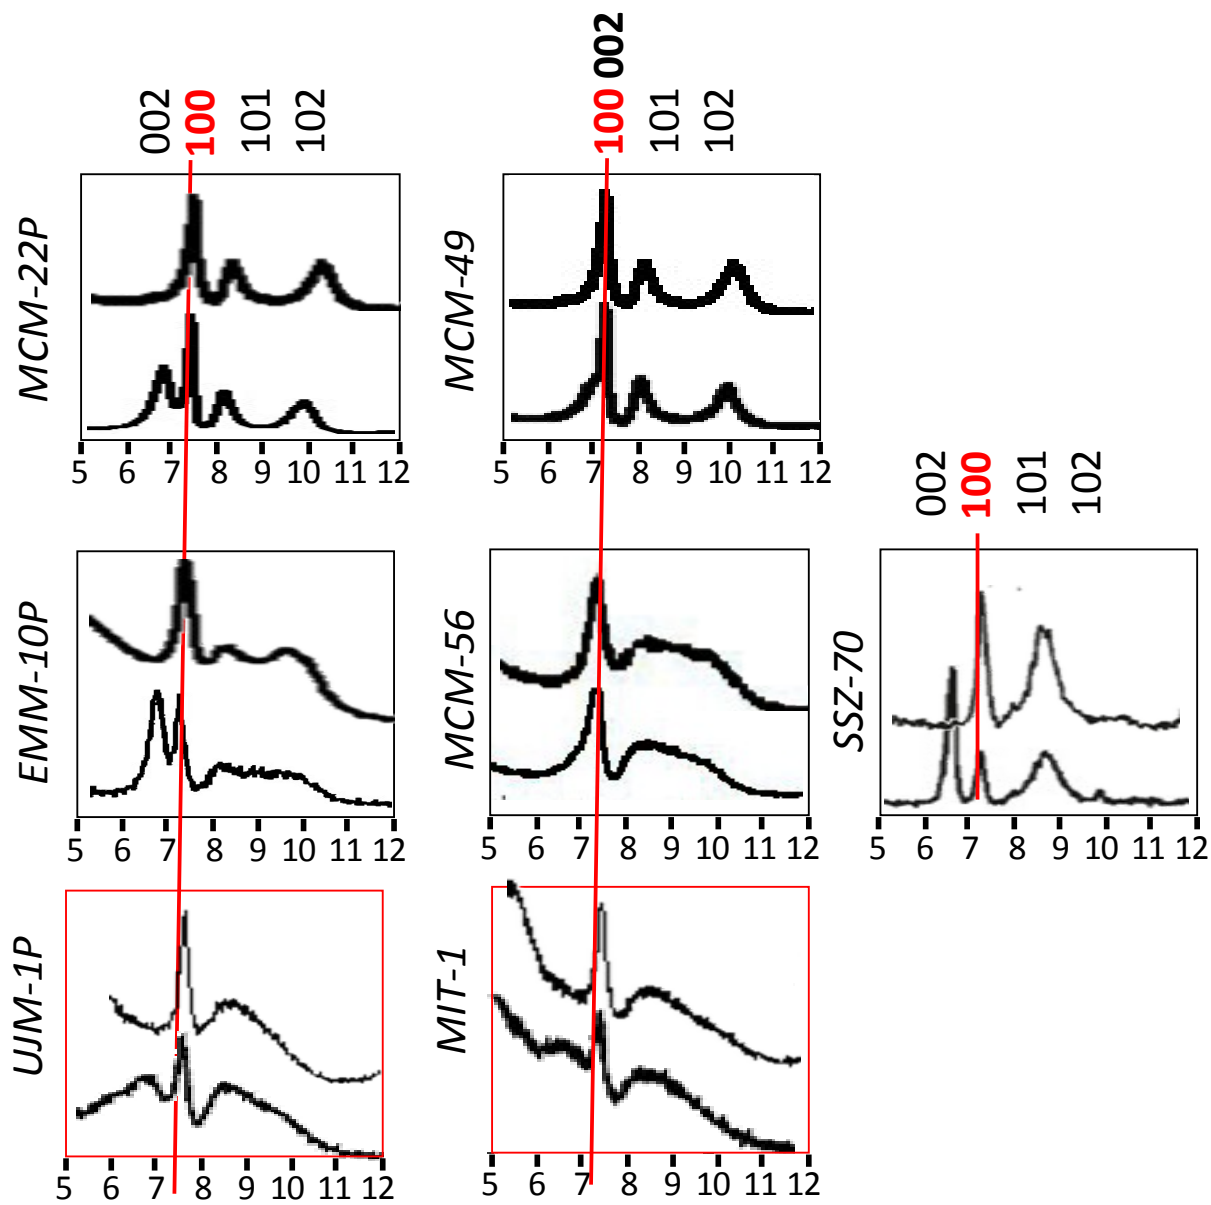

Figure S2. Expanded Fig. 3 comparing XRD patterns of various as-synthesized MWW layered forms with their calcined versions, representing the finally used catalysts.

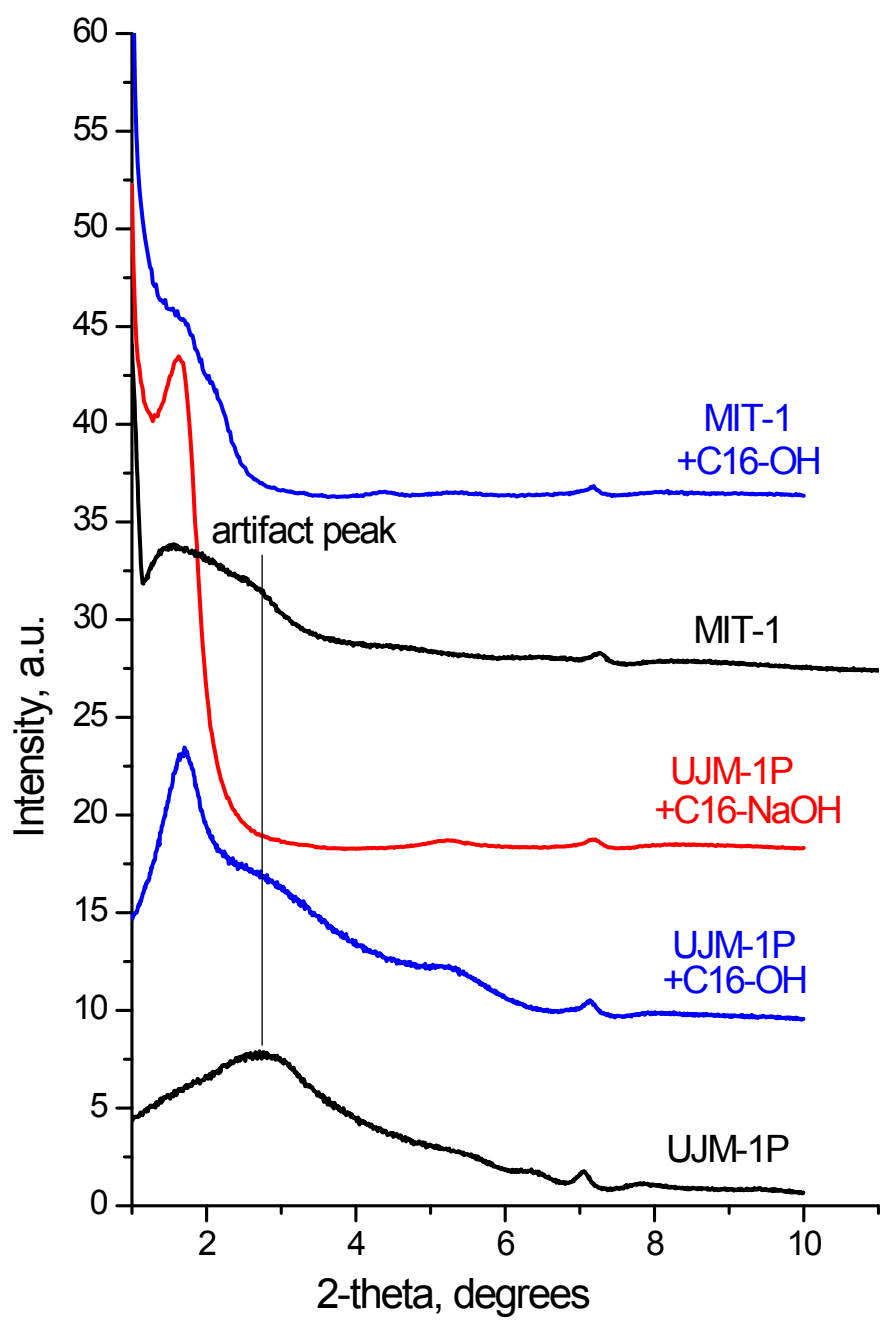

Figure S3. Low angle XRDs for swollen MIT-1 and UJM-1P

Table S1. Catalytic reaction data about various MWW catalysts in the benzylation of mesitylene.

| <b>Zeolite</b> | <b>Benzyl alcohol conversion,%<sup>a</sup></b> | <b>Selevticity of BTB<sup>b</sup>, %<sup>a</sup></b> |
|----------------|------------------------------------------------|------------------------------------------------------|
| UJM-1          | 100                                            | 100                                                  |
| MIT-1          | 57                                             | 89                                                   |
| MCM-22         | 63                                             | 91                                                   |
| MCM-56         | 100                                            | 94                                                   |

<sup>a</sup>Reaction time=120 min

<sup>b</sup>2-benzyl-1,3,5-trimethylbenzene
